# Supplementary material
Source: publisher figshare collection journal article supplement (https://karger.figshare.com/ndownloader/files/39591250)

**Supplementary Figure A:** The Kaplan-Meier curve for recurrence-free probability after I-125 plaque brachytherapy treatment in 176 patients with uveal melanoma of the choroid and/or ciliary body with a median post-operative follow-up of 23.2 months


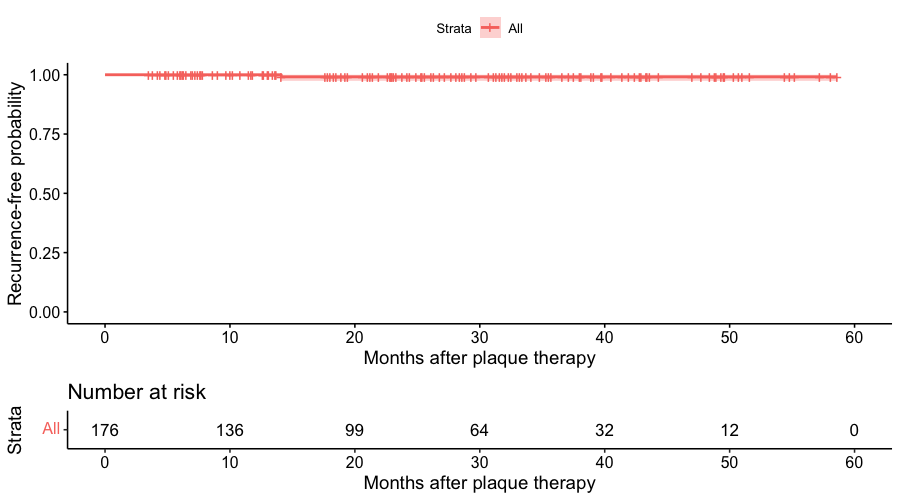

Supplement: Supplementary file 1 [file 39591250]
